# Supplementary material for: Synthesis and characterization of low-molecular-weight π-conjugated polymers covered by persilylated β-cyclodextrin
Source: publisher site journal article supplement (doi:10.3762/bjoc.8.170), 2012-09-11
Supplement: Additional file 1 [file 1860-5397-8-170-S1.pdf]

**Supporting Information**

**for**

**Synthesis and characterization of low-molecular-weight  $\pi$ -conjugated polymers covered by persilylated  $\beta$ -cyclodextrin**

Aurica Farcas\*, Ana-Maria Resmerita, Andreea Stefanache, Mihaela Balan and Valeria Harabagiu

Address: Inorganic Polymers, "Petru Poni" Institute of Macromolecular Chemistry, Grigore Ghica Voda Alley, 700487-Iasi, Romania

Email: Aurica Farcas - [afarcas@icmpp.ro](mailto:afarcas@icmpp.ro)

\* Corresponding author

**Gel permeation chromatography and derivative thermogravimetric curves**

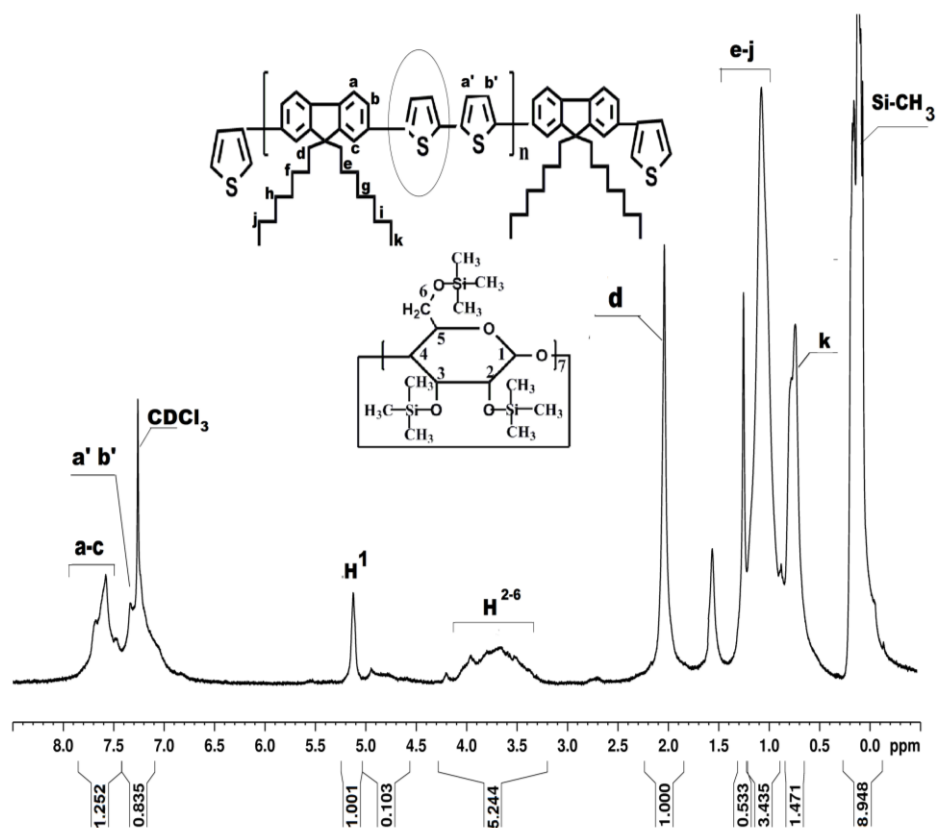

**Figure S1:**  $^1\text{H}$  NMR spectrum of **PDOF-BTc** rotaxane copolymer (soluble part in petroleum ether).

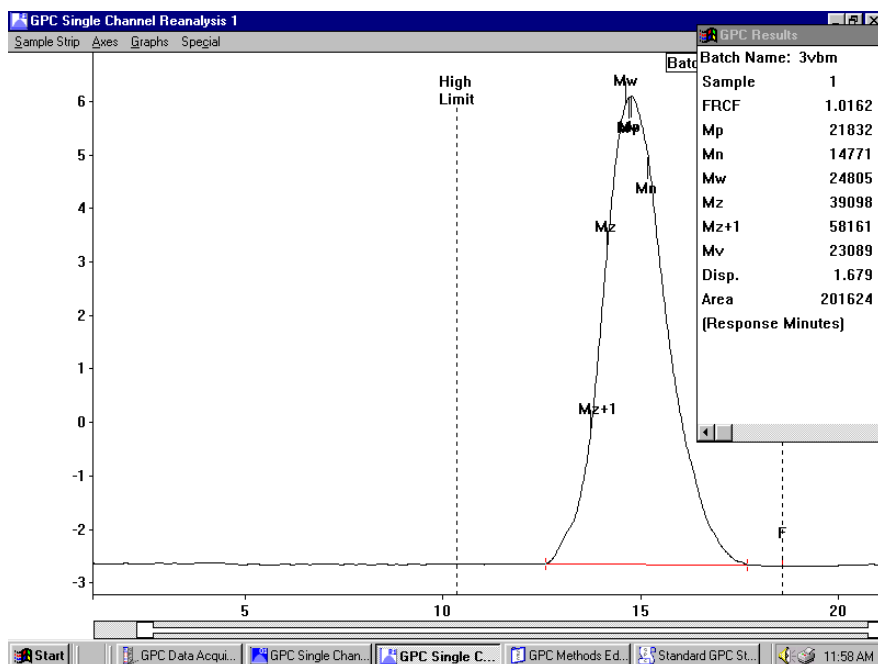

**Figure S2:** Gel permeation chromatography (GPC) of **PDOF-BTc** rotaxane copolymer.

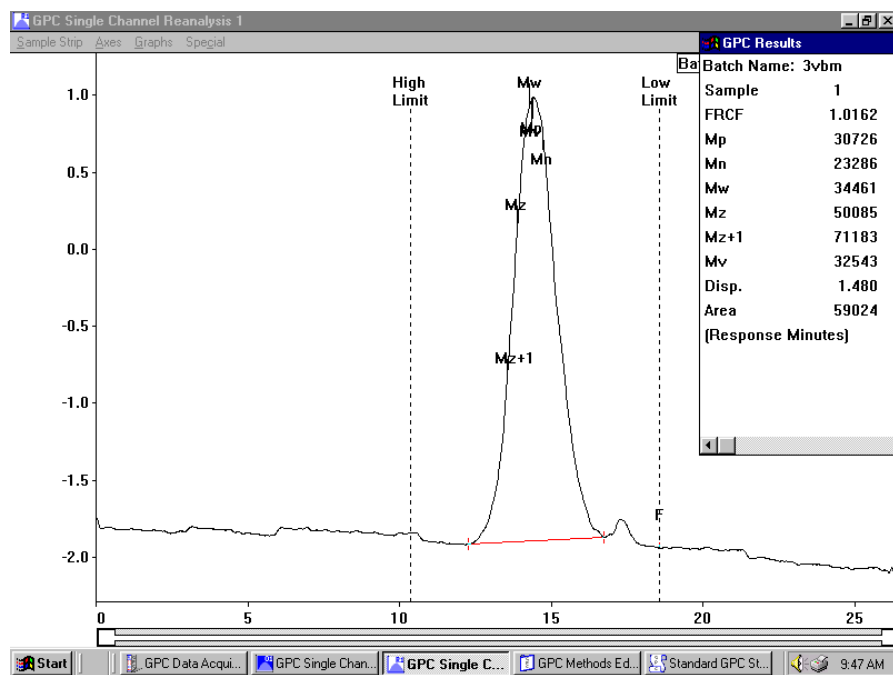

**Figure S3:** GPC of PDOF-BT non-rotaxane copolymer.

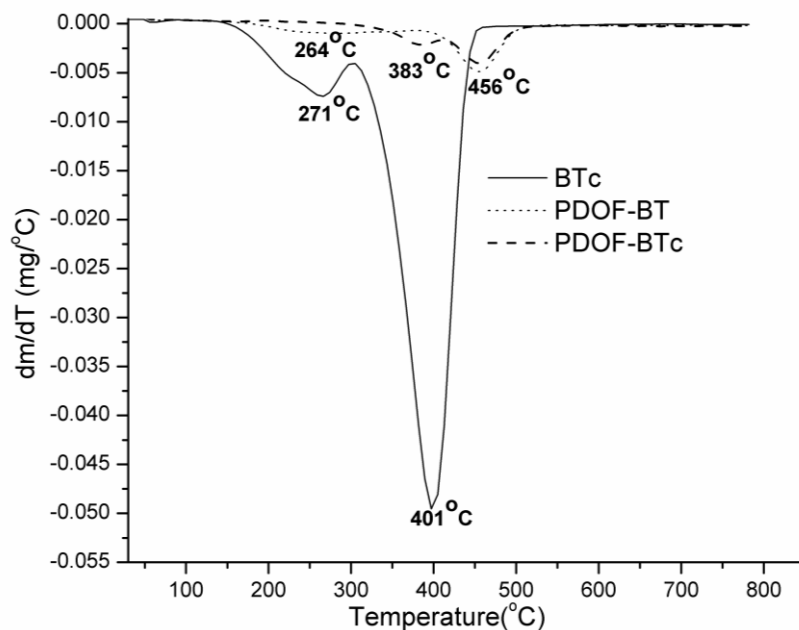

**Figure S4:** Derivative thermogravimetric curves (DTG) of BTc, PDOF-BT and PDOF-BTc samples.
